# Supplementary material for: EXACT: a collaboration toolset for algorithm-aided annotation of images with annotation version control
Source: PubMed Central journal article supplement (PMC7902667; doi:10.1038/s41598-021-83827-4), 2021-02-23
Supplement: 41598_2021_83827_MOESM1_ESM.pdf [file 41598_2021_83827_MOESM1_ESM.pdf]

EXACT: A collaboration toolset for algorithm-aided annotation of images with annotation version control

Christian Marzahl<sup>1,2,\*</sup>, Marc Aubreville<sup>1,4</sup>, Christof A. Bertram<sup>3</sup>, Jennifer Maier<sup>1</sup>, ChristianBergler<sup>1</sup>, Christine Kröger<sup>2</sup>, Jörn Voigt<sup>2</sup>, Katharina Breininger<sup>1</sup>, Robert Klopffleisch<sup>3</sup>, and Andreas Maier<sup>1</sup>

| File                     | Title                | Supplementary File | Caption                                                                     |
|--------------------------|----------------------|--------------------|-----------------------------------------------------------------------------|
| Annotation Templates.mp4 | Annotation Templates | 3                  | How to create annotation templates with EXACT                               |
| Segmentation.mp4         | Segmentation         | 11                 | How to segment with EXACT                                                   |
| Density Maps.mp4         | Density Maps         | 6                  | How to create density maps and explanation of the EIPH plugin               |
| SlideRunner.mp4          | SlideRunner          | 12                 | How to synchronise between SlideRunner and EXACT                            |
| ImageSets creation.mp4   | ImageSets creation   | 7                  | How to create image sets and upload images                                  |
| Annotation Maps.mp4      | Annotation Maps      | 2                  | How to create annotation maps                                               |
| Demo Dataset.mp4         | Demo Dataset         | 5                  | How to setup and use a demo data set                                        |
| Sound Clustering.mp4     | Sound Clustering     | 13                 | How to perform sound clustering and visualisation                           |
| User Rights.mp4          | User Rights          | 14                 | How to setup user access rights                                             |
| ImageSets details.mp4    | ImageSets details    | 8                  | Explain image set details                                                   |
| Versioning.mp4           | Versioning           | 15                 | How to create a new image set version and track changes                     |
| Annotation download.mp4  | Annotation download  | 1                  | How to download annotations<br>Explanation of parts of the annotation study |
| Inference.mp4            | Inference            | 9                  | Example for REST-API and JavaScript inference                               |
| Installation.mp4         | Installation         | 10                 | EXACT installation guide with Docker                                        |
| Asthma Clustering.mp4    | Asthma Clustering    | 4                  | How to cluster Asthma cells                                                 |
